# Supplementary material for: Inhibitory Effect of Berberine on Broiler P-glycoprotein Expression and Function: In Situ and In Vitro Studies
Source: PubMed Central journal article supplement (PMC6515058; doi:10.3390/ijms20081966), 2019-04-22
Supplement: ijms-20-01966-s001.pdf [file ijms-20-01966-s001.pdf]

## Supplementary Material

**Article title:** Inhibitory effect of berberine on chicken P-glycoprotein expression and function: *in situ* and *in vitro* studies

**Journal name:** International Journal of Molecular Sciences

**Author names:** Yujuan Zhang, Li Guo, Jinhua Huang, Yong Sun, Fang He, Mire Zloh\*, Liping Wang\*

**\*Co-corresponding authors:**

Dr. Liping Wang, College of Veterinary Medicine, Nanjing Agricultural University, Nanjing, Jiangsu Province, 210095, PR China. Email: wlp71@163.com

Dr. Mire Zloh, Faculty of Pharmacy, University Business Academy, Trg mladenaca 5, 21000 Novi Sad, Serbia. Email: zloh@live.co.uk

**Figure S1.**

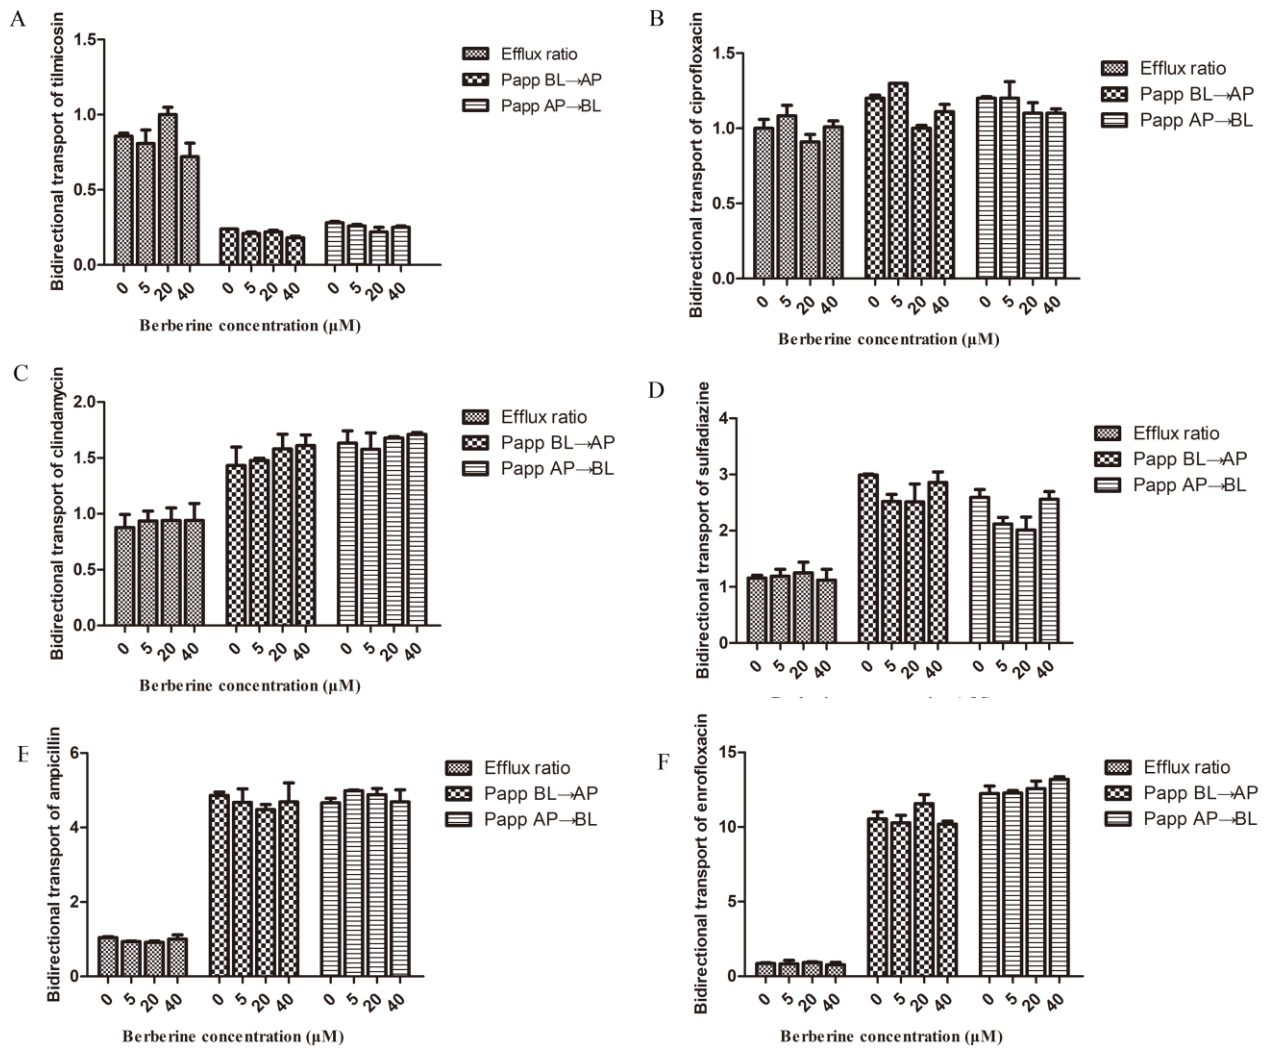

**Fig. S1** Bi-directional transport of difference chicken P-gp substrates across MDCK cell monolayer after pre-treatment with berberine for 2 h. **(A)** Tilmicosin. **(B)** Ciprofloxacin. **(C)** Clindamycin. **(D)** Sulfadiazine. **(E)** Ampicillin. **(F)** Enrofloxacin. Data are shown as mean ± SEM of three independent experiments.

**Table S1.** Sequence alignment of mouse and chicken p-glycoprotein primary sequences based on the structural alignment of the two proteins using experimentally determined binding site of the mouse p-glycoprotein xray crystallography structure. The overlay of the two structures was achieved using structural alignment of protein structures tool implemented in Maestro. The letters in the bold and encompassed by a red frame are identified as binding site residues.

|                                             |       |     |                         |                                                                                                                           |
|---------------------------------------------|-------|-----|-------------------------|---------------------------------------------------------------------------------------------------------------------------|
| 3G60                                        | SSA 1 | 57  | .....+.....+.....+..... | HHHHHHHHHHHHHHHHHHHHH-CC-CCHHHHHHCC-CCCCH                                                                                 |
| Homology model of p-glycoprotein in chicken | SSA 2 | 69  |                         | CC-CCCHHHHHHHHCHHHHHCCCCCCCC-CCCCCCCC-H                                                                                   |
| 3G60                                        | 1     | 57  |                         | AIHGVALPL <b>M</b> <b>L</b> <b>I</b> <b>F</b> GDMTD-FA-EYYTGTIGVL-AQGMF                                                   |
| Homology model of p-glycoprotein in chicken | 2     | 69  |                         | AA-HGTSLP <b>I</b> <b>A</b> <b>M</b> <b>I</b> <b>F</b> GDMTDSFVLEMYA-YYSIAVAQF-Q                                          |
| .....+.....+.....+.....                     |       |     |                         |                                                                                                                           |
| 3G60                                        | SSA 1 | 302 |                         | HHHHHHHHHHH-C-CCC-HHHHHHHHHHHHHHHHHHHHHC                                                                                  |
| Homology model of p-glycoprotein in chicken | SSA 2 | 313 |                         | HHHHHHHHHHHHHCHHHHHHHHHHCHHHHHHHHHHHHHH-C                                                                                 |
| 3G60                                        | 1     | 302 |                         | <b>I</b> <b>Y</b> ASYALAFWY-T-IGQ-VLT <b>V</b> <b>F</b> <b>S</b> <b>V</b> <b>L</b> <b>I</b> G <b>A</b> <b>F</b> SVGQASPNA |
| Homology model of p-glycoprotein in chicken | 2     | 313 |                         | <b>L</b> <b>I</b> YASYALAFWYGISIGNVLT <b>V</b> <b>F</b> <b>S</b> <b>V</b> <b>L</b> <b>I</b> G <b>A</b> <b>F</b> SIGQTAP-A |
| .....+.....+.....+.....                     |       |     |                         |                                                                                                                           |
| 3G60                                        | SSA 1 | 715 |                         | HHHHHHHHHHHHHHHHHHHHHHC---CCHHHHHHHHHHHH                                                                                  |
| Homology model of p-glycoprotein in chicken | SSA 2 | 728 |                         | HHHHHHCCCHHHH-H---HHHHHCCC-HHHHHHHH-HHH                                                                                   |
| 3G60                                        | 1     | 715 |                         | IINGGL <b>Q</b> <b>P</b> <b>A</b> <b>F</b> <b>S</b> <b>V</b> <b>I</b> <b>F</b> SKVVG <b>V</b> FTN---QNNLFSLLFLILGI        |
| Homology model of p-glycoprotein in chicken | 2     | 728 |                         | IVNGAL <b>Q</b> <b>P</b> <b>A</b> <b>F</b> <b>S</b> <b>V</b> <b>I</b> <b>F</b> ---SEIIGIFSS-LYSLFLA-LGI                   |
| .....+.....+.....+.....                     |       |     |                         |                                                                                                                           |
| 3G60                                        | SSA 1 | 968 |                         | -----HHHHHHHH-                                                                                                            |
| Homology model of p-glycoprotein in chicken | SSA 2 | 980 |                         | -----HHHHHHHH-                                                                                                            |
| 3G60                                        | 1     | 968 |                         | -----ENV <b>L</b> <b>L</b> <b>V</b> <b>F</b> <b>S</b> -                                                                   |
| Homology model of p-glycoprotein in chicken | 2     | 980 |                         | -----KT <b>V</b> <b>L</b> <b>V</b> <b>F</b> <b>S</b> A                                                                    |
| .....+.....+.....+.....                     |       |     |                         |                                                                                                                           |
| 3G60                                        | SSA 1 | 976 |                         | HHHHHHHHHHHHHCCCC                                                                                                         |
| Homology model of p-glycoprotein in chicken | SSA 2 | 989 |                         | HHHHHHHHHHHHHHH--                                                                                                         |
| 3G60                                        | 1     | 976 |                         | AI <b>V</b> FGAMAVGQVSSFAD                                                                                                |
| Homology model of p-glycoprotein in chicken | 2     | 989 |                         | V <b>V</b> FGAMALGQTSSFA--                                                                                                |

**Alignment RMSD between two binding sites: 2.442 Angstrom**

**Table S2.** Binding site residues identified in x-ray crystallography model of mouse p-glycoprotein (PDB ID:3G60) and equivalent residues in putative binding site of the homology model of chicken p-glycoprotein. Structural alignment of protein structures tool implemented in Maestro was used to determine the putative binding site in the homology model.

| <b>PDB ID: 3G60</b> | <b>Homology model</b> |
|---------------------|-----------------------|
| M68                 | M80                   |
| F71                 | F83                   |
| Y303                | I314 (F315)           |
| F332                | F344                  |
| L335                | L347                  |
| I336                | I348                  |
| F339                | F351                  |
| Q721                | Q734                  |
| F724                | F737                  |
| S725                | S738                  |
| F728                | F741                  |
| L971                | F983 (L984)           |
| F974                | F986                  |
| S975                | S987                  |
| V978                | F991 (V990)           |

Residues in the brackets indicate neighbouring residues that are the same type as the residues in the crystal structure.

**Figure S2.** Overlay of berberine docking pose (thick gray lines) in the chicken p-glycoprotein binding site and the A) p-glycoprotein substrates (thin lines with morphine carbon atoms coloured in green and rhodamine 123 carbon atoms coloured in cyan) and B) p-glycoprotein inhibitors (thin lines with indinavir carbon atoms coloured in green, ritonavir carbon atoms shown in cyan and saquinavir carbon atoms coloured in purple). The protein model was obtained using homology modelling and the docking poses were obtained using Autodock Vina.

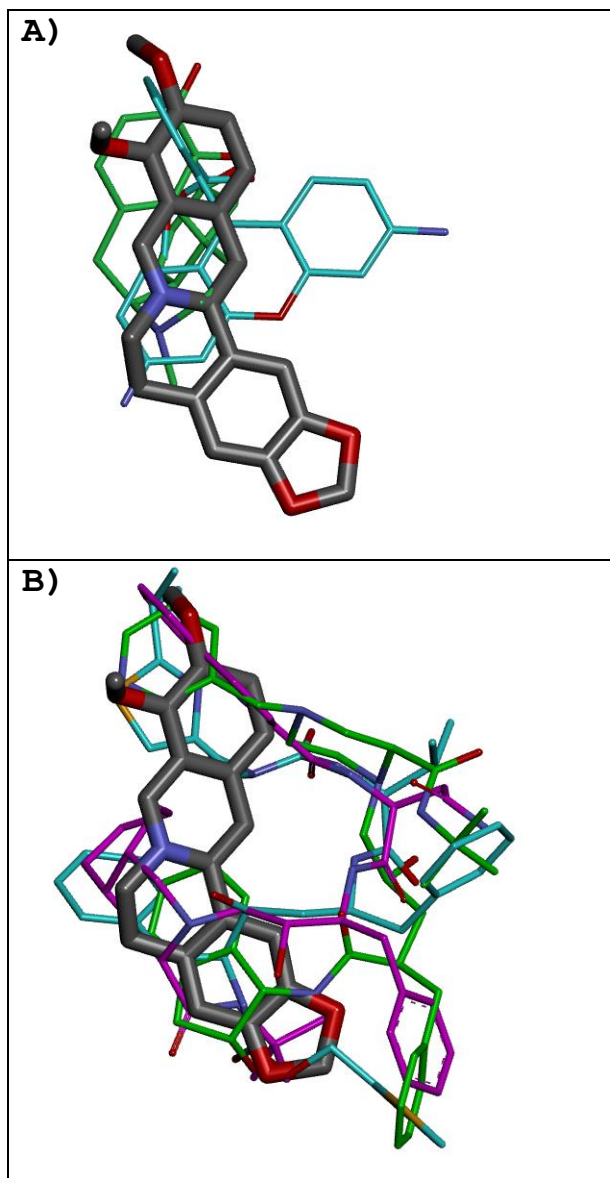

**Table S3.** The docking scores of berberine compared to selected P-gp substrates and inhibitors obtained by predicting binding affinities to the chicken ATP-binding cassette sub-family C, member 7 (CABCC7) and chicken multidrug and toxic compound extrusion (CMATE) transporters.

| Name         | Docking score (kcal/mol) <sup>&amp;</sup> |       |
|--------------|-------------------------------------------|-------|
|              | CABCC7                                    | CMATE |
| berberine    | -7.9                                      | -7.9  |
| morphine     | -6.8                                      | -7.1  |
| rhodamine123 | -7.3                                      | -7.9  |
| indinavir    | -8.7                                      | -8.6  |
| ritonavir    | -7.7                                      | -7.4  |
| saquinavir   | -7.8                                      | -9.3  |

&- docking score obtained using Autodock Vina for all small molecules

Figure S3

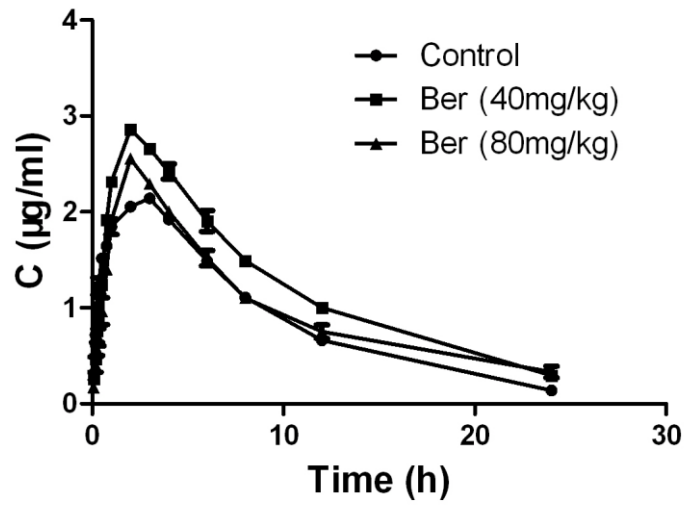

**Fig. S3** Plasma concentration-time profiles of enrofloxacin after oral administration without or with different doses berberine (40 mg/kg and 80 mg/kg). Data represent mean  $\pm$  S.E.M (n = 5).
